# Supplementary material
Source: publisher figshare collection journal article supplement (https://acs.figshare.com/ndownloader/files/5678937)
Supplement: Supplementary file 1 [file 5678937]

# cm0103500.cif


data_wong931_Dr._WK_Chan's_JC-1
#------------------------------------------------------------------------------

_audit_creation_date                  'Fri Aug  8 16:44:03 1997'
_audit_creation_method                'from TEXRAY.INF file'
_audit_update_record                   ?
#------------------------------------------------------------------------------

_computing_data_collection            'MSC/AFC Diffractometer Control'
_computing_cell_refinement            'MSC/AFC Diffractometer Control'
_computing_data_reduction             'teXsan'
_computing_structure_solution          SHELXS86
_computing_structure_refinement       'teXsan'
_computing_publication_material       'teXsan'
#------------------------------------------------------------------------------

_cell_length_a                         17.727(7)
_cell_length_b                         9.722(7)
_cell_length_c                         20.761(6)
_cell_angle_alpha                      90
_cell_angle_beta                       110.88(2)
_cell_angle_gamma                      90
_cell_volume                           3343(2)
_cell_formula_units_Z                  4
_cell_measurement_temperature          301.2
_cell_measurement_reflns_used          25
_cell_measurement_theta_min            13.5
_cell_measurement_theta_max            16.7
#------------------------------------------------------------------------------

_symmetry_cell_setting                 monoclinic
_symmetry_space_group_name_H-M        'C 2/c      '
_symmetry_Int_Tables_number            15
_symmetry_space_group_name_Hall        ?
loop_
_symmetry_equiv_pos_as_xyz
  '   +x,   +y,   +z'
  '   +x,   +y,   +z'
  '   -x,   +y,1/2-z'
  '   -x,   +y,1/2-z'
  '   -x,   -y,   -z'
  '   -x,   -y,   -z'
  '   +x,   -y,1/2+z'
  '   +x,   -y,1/2+z'
#------------------------------------------------------------------------------

_exptl_crystal_description            'XDIM'
_exptl_crystal_colour                 'colourlessXDIM'
_exptl_crystal_size_max                0.250
_exptl_crystal_size_mid                0.220
_exptl_crystal_size_min                0.210
_exptl_crystal_density_diffrn          1.478
_exptl_crystal_density_meas            ?
_chemical_formula_weight               744.13
_chemical_formula_analytical           ?
_chemical_formula_sum                  'C28 H42 Ba N6 O5 S2 '
_chemical_formula_moiety               '?'
_chemical_formula_structural           ?
_chemical_compound_source              ?
_exptl_crystal_F_000                   1520.00
_exptl_absorpt_coefficient_mu          1.356
_exptl_absorpt_correction_type         empirical
_exptl_absorpt_process_details         psi-scan
_exptl_absorpt_correction_T_max        1.000
_exptl_absorpt_correction_T_min        0.973
#------------------------------------------------------------------------------

_diffrn_special_details                none
_diffrn_ambient_temperature            301.2
_diffrn_radiation_wavelength           0.7107
_diffrn_radiation_type                 MoKalpha
_diffrn_radiation_source              'X-ray tube'
_diffrn_radiation_monochromator        graphite
_diffrn_radiation_detector             ?
_diffrn_measurement_device            'AFC7R'
_diffrn_measurement_method            'omega/2-theta scans'

_diffrn_standards_number              3
_diffrn_standards_interval_count      250
_diffrn_standards_decay_%             -5.97
loop_
_diffrn_standard_refln_index_h
_diffrn_standard_refln_index_k
_diffrn_standard_refln_index_l
     -3       1     -4
     -3       1     -5
     -3       3     -1
_diffrn_reflns_number                  3243
_reflns_number_total                   3130
_reflns_number_observed                2065
_reflns_observed_criterion             1.50
_diffrn_reflns_av_R_equivalents        0.03
_diffrn_reflns_av_sigmaI/netI          ?
_diffrn_reflns_limit_h_min             0
_diffrn_reflns_limit_h_max             21
_diffrn_reflns_limit_k_min             0
_diffrn_reflns_limit_k_max             11
_diffrn_reflns_limit_l_min             -24
_diffrn_reflns_limit_l_max             23
_diffrn_reflns_theta_min               ?
_diffrn_reflns_theta_max               25.00
_diffrn_reflns_reduction_process       ?

_diffrn_orient_matrix_UB_11            0.02734
_diffrn_orient_matrix_UB_12            0.08853
_diffrn_orient_matrix_UB_13           -0.00289
_diffrn_orient_matrix_UB_21            0.00702
_diffrn_orient_matrix_UB_22           -0.03248
_diffrn_orient_matrix_UB_23           -0.04322
_diffrn_orient_matrix_UB_31           -0.05337
_diffrn_orient_matrix_UB_32            0.04108
_diffrn_orient_matrix_UB_33           -0.02795
#------------------------------------------------------------------------------

loop_
_atom_type_symbol
_atom_type_oxidation_number
_atom_type_number_in_cell
_atom_type_scat_dispersion_real
_atom_type_scat_dispersion_imag
_atom_type_scat_source
  Ba 0     4 -0.324 2.282     'International Tables'
  N  0    24 0.006 0.003     'International Tables'
  S  0     8 0.125 0.123     'International Tables'
  O  0    20 0.011 0.006     'International Tables'
  C  0   112 0.003 0.002     'International Tables'
  H  0   168 0.000 0.000     'International Tables'
#------------------------------------------------------------------------------

loop_
_atom_site_label
_atom_site_fract_x
_atom_site_fract_y
_atom_site_fract_z
_atom_site_U_iso_or_equiv
_atom_site_thermal_displace_type
_atom_site_calc_flag
_atom_site_calc_attached_atom
 Ba(1)  0.0000      0.12772(6)  0.7500      0.0489(1)   Uij ? ?
 S(1)   -0.0717(1)  -0.2808(3)  0.8755(1)   0.1086(8)   Uij ? ?
 O(1)   -0.0691(3)  0.2187(4)   0.8466(2)   0.076(1)    Uij ? ?
 O(2)   -0.1530(2)  0.2486(4)   0.7048(2)   0.070(1)    Uij ? ?
 O(3)   0.0000      0.4060(5)   0.7500      0.073(2)    Uij ? ?
 N(1)   -0.0971(3)  0.1163(5)   0.6004(2)   0.063(1)    Uij ? ?
 N(2)   -0.3953(3)  -0.1247(6)  0.3325(2)   0.087(2)    Uij ? ?
 N(3)   -0.0930(4)  -0.0963(7)  0.7697(3)   0.105(3)    Uij ? ?
 C(1)   0.0472(4)   0.1512(8)   0.9403(3)   0.086(2)    Uij ? ?
 C(2)   -0.0132(5)  0.2631(8)   0.9097(3)   0.092(3)    Uij ? ?
 C(3)   -0.1355(4)  0.3134(7)   0.8190(4)   0.083(2)    Uij ? ?
 C(4)   -0.1917(4)  0.2557(8)   0.7524(4)   0.091(3)    Uij ? ?
 C(5)   -0.2060(3)  0.2076(7)   0.6373(4)   0.081(2)    Uij ? ?
 C(6)   -0.1605(4)  0.2195(6)   0.5896(3)   0.080(2)    Uij ? ?
 C(7)   -0.1302(3)  -0.0257(6)  0.5857(3)   0.064(2)    Uij ? ?
 C(8)   -0.2000(3)  -0.0496(6)  0.5176(3)   0.060(2)    Uij ? ?
 C(9)   -0.2772(4)  -0.0694(6)  0.5171(3)   0.067(2)    Uij ? ?
 C(10)  -0.3419(4)  -0.0951(6)  0.4558(3)   0.076(2)    Uij ? ?
 C(11)  -0.3297(4)  -0.1011(5)  0.3945(3)   0.068(2)    Uij ? ?
 C(12)  -0.2532(4)  -0.0790(7)  0.3941(3)   0.078(2)    Uij ? ?
 C(13)  -0.1886(4)  -0.0549(6)  0.4553(3)   0.073(2)    Uij ? ?
 C(14)  -0.0829(4)  -0.1699(7)  0.8145(3)   0.070(2)    Uij ? ?
 H(1)   0.0814      0.1756      0.9867      0.1016      Uij ? ?
 H(2)   0.0174      0.0698      0.9444      0.1016      Uij ? ?
 H(3)   0.0157      0.3444      0.9028      0.1103      Uij ? ?
 H(4)   -0.0394     0.2911      0.9411      0.1103      Uij ? ?
 H(5)   -0.1620     0.3319      0.8518      0.0988      Uij ? ?
 H(6)   -0.1159     0.4034      0.8100      0.0988      Uij ? ?
 H(7)   -0.2418     0.3085      0.7348      0.1068      Uij ? ?
 H(8)   -0.2090     0.1634      0.7615      0.1068      Uij ? ?
 H(9)   -0.2236     0.1130      0.6379      0.0973      Uij ? ?
 H(10)  -0.2546     0.2630      0.6220      0.0973      Uij ? ?
 H(11)  -0.1357     0.3105      0.5958      0.0924      Uij ? ?
 H(12)  -0.1970     0.2155      0.5423      0.0924      Uij ? ?
 H(13)  -0.0861     -0.0881     0.5870      0.0753      Uij ? ?
 H(14)  -0.1472     -0.0555     0.6230      0.0753      Uij ? ?
 H(15)  -0.2870     -0.0641     0.5605      0.0830      Uij ? ?
 H(16)  -0.3962     -0.1111     0.4564      0.0921      Uij ? ?
 H(17)  -0.2433     -0.0782     0.3498      0.0936      Uij ? ?
 H(18)  -0.1338     -0.0411     0.4541      0.0887      Uij ? ?
 H(19)  -0.3893     -0.1668     0.2869      0.0890      Uij ? ?
 H(20)  -0.4505     -0.1701     0.3338      0.0890      Uij ? ?
 H(21)  -0.0237     0.4952      0.7378      0.0890      Uij ? ?

loop_
_atom_site_aniso_label
_atom_site_aniso_U_11
_atom_site_aniso_U_22
_atom_site_aniso_U_33
_atom_site_aniso_U_12
_atom_site_aniso_U_13
_atom_site_aniso_U_23
 Ba(1)  0.0414(2)   0.0539(3)   0.0425(2)   0.0000      0.0041(2)
0.0000
 S(1)   0.084(1)    0.136(2)    0.101(2)    0.012(1)    0.028(1)
0.028(1)
 O(1)   0.084(3)    0.081(3)    0.061(3)    0.011(3)    0.023(2)
-0.005(2)
 O(2)   0.048(2)    0.081(3)    0.074(3)    0.003(2)    0.013(2)
-0.002(2)
 O(3)   0.066(3)    0.047(4)    0.088(4)    0.0000      0.008(3)
0.0000
 N(1)   0.069(3)    0.054(3)    0.051(2)    0.003(3)    0.003(2)
0.004(3)
 N(2)   0.087(3)    0.069(3)    0.065(3)    0.001(3)    -0.021(3)
-0.013(3)
 N(3)   0.111(5)    0.102(6)    0.097(5)    -0.026(4)   0.033(4)
0.005(4)
 C(1)   0.095(5)    0.107(6)    0.048(3)    0.019(5)    0.018(3)
-0.006(4)
 C(2)   0.113(6)    0.095(5)    0.068(4)    0.025(5)    0.033(4)
-0.014(4)
 C(3)   0.075(4)    0.094(5)    0.091(5)    0.016(4)    0.040(4)
-0.005(4)
 C(4)   0.061(4)    0.112(6)    0.104(6)    0.008(4)    0.035(4)
-0.005(5)
 C(5)   0.050(3)    0.075(5)    0.091(5)    0.009(3)    -0.010(3)
-0.005(4)
 C(6)   0.083(5)    0.059(4)    0.062(4)    0.007(4)    -0.020(3)
0.000(3)
 C(7)   0.070(4)    0.051(3)    0.053(3)    0.008(3)    0.000(3)
0.006(3)
 C(8)   0.065(4)    0.045(3)    0.055(3)    0.005(3)    0.003(3)
0.004(3)
 C(9)   0.081(4)    0.050(3)    0.058(4)    -0.014(3)   0.012(3)
0.003(3)
 C(10)  0.071(4)    0.056(4)    0.079(4)    -0.010(3)   0.002(3)
0.001(3)
 C(11)  0.081(4)    0.036(4)    0.064(4)    0.007(3)    -0.003(3)
-0.003(3)
 C(12)  0.092(5)    0.073(5)    0.054(4)    0.023(4)    0.008(3)
-0.012(3)
 C(13)  0.069(4)    0.073(4)    0.066(4)    0.013(3)    0.010(3)
-0.009(4)
 C(14)  0.059(4)    0.077(5)    0.072(4)    -0.018(3)   0.021(3)
-0.024(4)
#------------------------------------------------------------------------------

_refine_special_details                ?
_refine_ls_structure_factor_coef       F
_refine_ls_matrix_type                 full
_refine_ls_weighting_scheme            sigma
_refine_ls_hydrogen_treatment          noref
_refine_ls_extinction_method           none
_refine_ls_extinction_coef             ?
_refine_ls_abs_structure_details       ?
_refine_ls_abs_structure_Flack         ?
_refine_ls_number_reflns               2065
_refine_ls_number_parameters           191
_refine_ls_number_restraints           0
_refine_ls_number_constraints          ?
_refine_ls_R_factor_all                ?
_refine_ls_R_factor_obs                0.0406
_refine_ls_wR_factor_all               ?
_refine_ls_wR_factor_obs               0.0358
_refine_ls_goodness_of_fit_all         ?
_refine_ls_goodness_of_fit_obs         1.255
_refine_ls_shift/esd_max               0.0020
_refine_ls_shift/esd_mean              ?
_refine_diff_density_min               -0.30
_refine_diff_density_max               0.20
#------------------------------------------------------------------------------

_geom_special_details                  ?
loop_
_geom_bond_atom_site_label_1
_geom_bond_atom_site_label_2
_geom_bond_distance
_geom_bond_site_symmetry_1
_geom_bond_site_symmetry_2
_geom_bond_publ_flag
    Ba(1)     O(1)      2.838(4)   ? ? yes
    Ba(1)     O(1)      2.838(4)   ? ? yes
    Ba(1)     O(2)      2.793(4)   ? ? yes
    Ba(1)     O(2)      2.793(4)   ? ? yes
    Ba(1)     O(3)      2.706(5)   ? ? yes
    Ba(1)     N(1)      2.969(4)   ? ? yes
    Ba(1)     N(1)      2.969(4)   ? ? yes
    Ba(1)     N(3)      2.849(6)   ? ? yes
    Ba(1)     N(3)      2.849(6)   ? ? yes
    S(1)      C(14)     1.619(7)   ? ? yes
    O(1)      C(2)      1.400(7)   ? ? yes
    O(1)      C(3)      1.442(7)   ? ? yes
    O(2)      C(4)      1.390(7)   ? ? yes
    O(2)      C(5)      1.438(7)   ? ? yes
    N(1)      C(1)      1.465(7)   ? ? yes
    N(1)      C(6)      1.462(7)   ? ? yes
    N(1)      C(7)      1.489(7)   ? ? yes
    N(2)      C(11)     1.413(6)   ? ? yes
    N(3)      C(14)     1.136(8)   ? ? yes
    C(1)      C(2)      1.500(9)   ? ? yes
    C(3)      C(4)      1.495(9)   ? ? yes
    C(5)      C(6)      1.488(9)   ? ? yes
    C(7)      C(8)      1.529(7)   ? ? yes
    C(8)      C(9)      1.377(7)   ? ? yes
    C(8)      C(13)     1.380(8)   ? ? yes
    C(9)      C(10)     1.399(7)   ? ? yes
    C(10)     C(11)     1.366(8)   ? ? yes
    C(11)     C(12)     1.376(8)   ? ? yes
    C(12)     C(13)     1.394(8)   ? ? yes
#------------------------------------------------------------------------------

loop_
_geom_angle_atom_site_label_1
_geom_angle_atom_site_label_2
_geom_angle_atom_site_label_3
_geom_angle
_geom_angle_site_symmetry_1
_geom_angle_site_symmetry_2
_geom_angle_site_symmetry_3
_geom_angle_publ_flag
   O(1)      Ba(1)     O(1)      143.7(2)   ? ? ? yes
   O(1)      Ba(1)     O(2)      59.6(1)    ? ? ? yes
   O(1)      Ba(1)     O(2)      104.1(1)   ? ? ? yes
   O(1)      Ba(1)     O(3)      71.84(9)   ? ? ? yes
   O(1)      Ba(1)     N(1)      121.0(1)   ? ? ? yes
   O(1)      Ba(1)     N(1)      60.5(1)    ? ? ? yes
   O(1)      Ba(1)     N(3)      73.7(2)    ? ? ? yes
   O(1)      Ba(1)     N(3)      139.3(2)   ? ? ? yes
   O(1)      Ba(1)     O(2)      104.1(1)   ? ? ? yes
   O(1)      Ba(1)     O(2)      59.6(1)    ? ? ? yes
   O(1)      Ba(1)     O(3)      71.84(9)   ? ? ? yes
   O(1)      Ba(1)     N(1)      60.5(1)    ? ? ? yes
   O(1)      Ba(1)     N(1)      121.0(1)   ? ? ? yes
   O(1)      Ba(1)     N(3)      139.3(2)   ? ? ? yes
   O(1)      Ba(1)     N(3)      73.7(2)    ? ? ? yes
   O(2)      Ba(1)     O(2)      130.2(2)   ? ? ? yes
   O(2)      Ba(1)     O(3)      65.12(8)   ? ? ? yes
   O(2)      Ba(1)     N(1)      62.1(1)    ? ? ? yes
   O(2)      Ba(1)     N(1)      119.9(1)   ? ? ? yes
   O(2)      Ba(1)     N(3)      80.1(2)    ? ? ? yes
   O(2)      Ba(1)     N(3)      144.7(2)   ? ? ? yes
   O(2)      Ba(1)     O(3)      65.12(8)   ? ? ? yes
   O(2)      Ba(1)     N(1)      119.9(1)   ? ? ? yes
   O(2)      Ba(1)     N(1)      62.1(1)    ? ? ? yes
   O(2)      Ba(1)     N(3)      144.7(2)   ? ? ? yes
   O(2)      Ba(1)     N(3)      80.1(2)    ? ? ? yes
   O(3)      Ba(1)     N(1)      92.15(10)  ? ? ? yes
   O(3)      Ba(1)     N(1)      92.15(10)  ? ? ? yes
   O(3)      Ba(1)     N(3)      139.9(1)   ? ? ? yes
   O(3)      Ba(1)     N(3)      139.9(1)   ? ? ? yes
   N(1)      Ba(1)     N(1)      175.7(2)   ? ? ? yes
   N(1)      Ba(1)     N(3)      88.4(2)    ? ? ? yes
   N(1)      Ba(1)     N(3)      88.3(2)    ? ? ? yes
   N(1)      Ba(1)     N(3)      88.3(2)    ? ? ? yes
   N(1)      Ba(1)     N(3)      88.4(2)    ? ? ? yes
   N(3)      Ba(1)     N(3)      80.3(3)    ? ? ? yes
   Ba(1)     O(1)      C(2)      114.7(4)   ? ? ? yes
   Ba(1)     O(1)      C(3)      114.5(3)   ? ? ? yes
   C(2)      O(1)      C(3)      112.4(5)   ? ? ? yes
   Ba(1)     O(2)      C(4)      116.6(4)   ? ? ? yes
   Ba(1)     O(2)      C(5)      115.4(3)   ? ? ? yes
   C(4)      O(2)      C(5)      113.0(5)   ? ? ? yes
   Ba(1)     N(1)      C(1)      110.5(3)   ? ? ? yes
   Ba(1)     N(1)      C(6)      105.2(3)   ? ? ? yes
   Ba(1)     N(1)      C(7)      106.7(3)   ? ? ? yes
   C(1)      N(1)      C(6)      109.9(5)   ? ? ? yes
   C(1)      N(1)      C(7)      111.8(5)   ? ? ? yes
   C(6)      N(1)      C(7)      112.3(4)   ? ? ? yes
   Ba(1)     N(3)      C(14)     132.0(5)   ? ? ? yes
   N(1)      C(1)      C(2)      114.2(5)   ? ? ? yes
   O(1)      C(2)      C(1)      109.5(5)   ? ? ? yes
   O(1)      C(3)      C(4)      108.0(5)   ? ? ? yes
   O(2)      C(4)      C(3)      109.9(5)   ? ? ? yes
   O(2)      C(5)      C(6)      107.9(5)   ? ? ? yes
   N(1)      C(6)      C(5)      114.4(5)   ? ? ? yes
   N(1)      C(7)      C(8)      117.4(4)   ? ? ? yes
   C(7)      C(8)      C(9)      120.2(5)   ? ? ? yes
   C(7)      C(8)      C(13)     122.1(6)   ? ? ? yes
   C(9)      C(8)      C(13)     117.7(5)   ? ? ? yes
   C(8)      C(9)      C(10)     121.5(6)   ? ? ? yes
   C(9)      C(10)     C(11)     120.2(6)   ? ? ? yes
   N(2)      C(11)     C(10)     120.3(6)   ? ? ? yes
   N(2)      C(11)     C(12)     120.8(6)   ? ? ? yes
   C(10)     C(11)     C(12)     118.9(6)   ? ? ? yes
   C(11)     C(12)     C(13)     120.8(6)   ? ? ? yes
   C(8)      C(13)     C(12)     120.9(6)   ? ? ? yes
   S(1)      C(14)     N(3)      176.9(6)   ? ? ? yes
#------------------------------------------------------------------------------

_publ_requested_journal               ' ENTER JOURNAL NAME HERE'

_publ_contact_author
;
    ENTER NAME
 ENTER ADDRESS
;
_publ_contact_letter
;
    ENTER TEXT OF LETTER
;

_publ_requested_coeditor_name          ?
_publ_contact_author_phone            ' ENTER PHONE NUMBER '
_publ_contact_author_fax              ' ENTER FAX NUMBER '
_publ_contact_author_email            ' ENTER EMAIL ADDRESS '
loop_
_publ_author_name
_publ_author_address
' FIRST AUTHORS NAME '
;
  FIRST AUTHORS ADDRESS
;

_publ_section_title
;
    ENTER SECTION TITLE
;

_publ_section_abstract
;
    ENTER ABSTRACT
;

_publ_section_experimental
;
    ENTER EXPERIMENTAL SECTION
;

_publ_section_comment
;
    ENTER TEXT
;

_publ_section_references
;
    ENTER OTHER REFERENCES
Molecular Structure Corporation (1985, 1992). teXsan.
Crystal Structure Analysis Package, The Woodlands, TX, USA 77381
;

_publ_section_acknowledgements
;
    ENTER ACKNOWLEDGEMENTS
;

_publ_section_table_legends
;
    ENTER TABLE LEGENDS
;

_publ_section_figure_captions
;
    ENTER FIGURE CAPTIONS
;

#===END
